# Supplementary material
Source: ML conference proceedings conference paper supplement (https://aclanthology.org/2021.nlp4convai-1.10)
Supplement: Software [file ConvAI_2021___XPersona__Supplementary_-2.pdf › ConvAI_2021___XPersona__Supplementary_-2.pdf]

# XPersona: Evaluating Multilingual Personalized Chatbot

Zhaojiang Lin\*, Zihan Liu\*, Genta Indra Winata\*, Samuel Cahyawijaya\*, Andrea Madotto\*,  
Yejin Bang, Etsuko Ishii, Pascale Fung

Center for Artificial Intelligence Research (CAiRE)

Department of Electronic and Computer Engineering

The Hong Kong University of Science and Technology, Clear Water Bay, Hong Kong

{zlinao, zliucr, giwinata, scahyawijaya, amadotto}@connect.ust.hk

## A Dataset Collection

### A.1 Annotation Instructions

In this section, we show the instructions for French annotation:

- There are two existing columns of conversations: the first column (en) is the original conversations in English, the second column (fr) is the conversations translated by an automatic system (e.g., Google Translate).
- You should copy the conversation from the second column (the translated conversations) into the third column (named fr\_annotation). In that column, you should then revise the incorrect or inappropriate translations.
- The goal of the revision is to make the conversations more coherent and fluent in the target language (French). Hence you can customize dialogues and persona sentences to make them fluent and coherent in the target language, including by deviating from the original translation. However, you should retain persona and conversation consistency.

### A.2 Training Set Statistics

We report our iterative revised training set statistics in Table 1. The partial samples of revision for each language are shown in Table 2 to Table 7. There are some rules for each replacement, but due to space limitation, the revision condition is not reported in the corresponding table.

## B Human Evaluation

As illustrated in Figure 1, the annotator is provided with two full dialogues made by a self-chat model or human-dialogues. Then the annotators are asked the following questions:

\* Equal contributions. Listing order is random

| Train |         |        |      |       |
|-------|---------|--------|------|-------|
| Lang  | # Dial. | # Utt. | Edit | BLEU  |
| Fr    | 16878   | 248244 | 0.06 | 99.98 |
| It    | 16878   | 248244 | 1.09 | 99.8  |
| Id    | 16878   | 248244 | 0.18 | 99.94 |
| Jp    | 16878   | 248244 | 0.38 | 99.17 |
| Ko    | 16878   | 248244 | 0.97 | 99.51 |
| Zh    | 16878   | 248244 | 0.52 | 98.1  |

Table 1: The number of dialogues (#Dial.) and utterances (#Utt.) of the training set in six languages. Edit distance per dialogue and BLEU score are computed to show the difference between the iterative revised dataset and auto-translated dataset.

| en text     | source       | replacement      |
|-------------|--------------|------------------|
| i am good   | Je suis bon  | Je vais bien     |
| that's neat | soigné       | parfait          |
| that's neat | propre       | parfait          |
| that's neat | net          | parfait          |
| lab         | labo         | labrador         |
| how sweet   | c'est gentil | Comme c'est doux |

Table 2: Samples of 'fr' revision on training set

| en text           | source             | replacement       |
|-------------------|--------------------|-------------------|
| neat              | rapi               | bagus             |
| the rolling stone | batu bergulir      | the rolling stone |
| a lab             | laboratorium       | labrador          |
| black lab         | lab hitam          | labrador hitam    |
| white lab         | laboratorium putih | labrador putih    |
| code              | kode               | membuat kode      |
| shirts            | kemeja             | kaus              |
| hard core         | inti keras         | ekstrem           |
| gymnastics        | senam              | gimnastik         |
| city of n y       | kota n             | kota new york     |
| grand kids        | cucu               | cucu              |

Table 3: Samples of 'id' revision on training set

- Who would you talk to for a long conversation?
- If you had to say one of these speakers is

**Which Conversational Partner is Better?**  
Evaluate quality of conversations through comparison.

Dialogue 1/9

oh nice ! have you been biking for a while ?

i'm a farmer, i'm a big family

yeah , i get practise riding everywhere now

i have two kids and a husband who lives on a farm.

that is really cool ! how often do you bike ?

i was raised on a small town, so i love animals

5 days a week at least

my husband is a painter, i love animals.

nice ! you sound very active .

that is cool, do you have any pets?

it is , i like staying very active to keep in good health

no, but i've two children who are here.

it is good to stay healthy !

i've a dog named radar

yes and that is why i love to try and learn new languages . . .

i've a cat named radar.

that sounds like so much fun . what languages ?

i have a cat named radar

spanish , french , german , anything else along the way

what kind of cat do you have?

so how did you learn so many languages ?

we have two german shepards

i speak several languages but it wasn't easy

that's cute. i love cats. i also have a couple of kids.

Who would you talk for a long conversation?

☐ I would prefer to talk to **Speaker 1**
☐ I would prefer to talk to **Speaker 2**

If you had to say one of these speakers is interesting and one is boring, who would you say is more interesting?

☐ **Speaker 1** is more interesting
 ☐ **Speaker 2** is more interesting

Which speaker sounds more human?

☐ **Speaker 1** sounds more human
 ☐ **Speaker 2** sounds more human

**Submit**

Figure 1: Human evaluation interface modified from ACUTE-EVAL

| en text         | source              | replacement         |
|-----------------|---------------------|---------------------|
| sounds exciting | suona eccitante     | sembra interessante |
| lab             | laboratorio         | labrador            |
| that's too bad  | è troppo male       | che peccato         |
| whats up        | che cosa succede ?  | come butta?         |
| monopoly        | monopolio           | monopoly            |
| rolling stones  | le pietre rotolanti | i rolling stones    |
| cool            | freddo              | figo                |
| i am great      | sono grande         | sto benissimo       |
| nice !          | simpatico !         | bello !             |
| nice .          | simpatico .         | bello !             |

Table 4: Samples of ‘it’ revision on training set

interesting and one is boring, who would you say is more interesting?

- Which speaker sounds more human?

## C Generated Samples

### C.1 Mixed-language Samples

We report more the mixed-language samples generated by M-CausalBert in Table 6-9.

| en text         | source   | replacement |
|-----------------|----------|-------------|
| lol             | 大声笑      | 哈哈          |
| how sweet       | 有多甜      | 很甜蜜         |
| that's neat     | 那很整齐     | 那很好         |
| walk dogs       | walk狗    | 遛狗          |
| twitch streamer | 抽搐者      | 主播          |
| twitch          | 抽搐       | 直播          |
| dog walking     | walking狗 | 遛狗          |
| lab             | 实验室      | 拉布拉多狗       |
| volunteer       | 志工       | 志愿者         |
| i am doing good | 我做得很好    | 我很好         |
| superpower      | 超级大国     | 超能力         |

Table 5: Samples of ‘zh’ Revision on training set

| en text                | source      | replacement |
|------------------------|-------------|-------------|
| country                | 国           | カントリー       |
| country                | 田舎          | カントリー       |
| lab                    | 研究室         | ラブラドル       |
| lab                    | 実験室         | ラブラドル       |
| lab                    | ラボ          | ラブラドル       |
| superpower             | 超大国         | 超能力         |
| folk song              | 民ソング        | フォークソング     |
| lazy                   | 怠cat        | 怠惰          |
| civic                  | 市民          | シビック        |
| I'm sorry to hear that | それを聞いてすみません | それはお気の毒に    |
| haha                   | 母           | ハハ          |
| awesome                | 驚くばかり       | 素晴らしい       |
| dr pepper              | コショウ博士      | ドクターペッパー    |
| plank                  | 厚板          | プランク        |
| apple                  | リンゴ         | アップル        |
| apple                  | りんご         | アップル        |
| lol                    | lol         | 笑           |
| awe                    | a敬の念        | うわー         |

Table 6: Samples of ‘jp’ Revision on training set

| en text         | source  | replacement |
|-----------------|---------|-------------|
| country         | 시골      | 컨트리         |
| lol             | lol     | ㅋㅋㅋ         |
| lol             | lol은    | ㅋㅋㅋ         |
| lab             | 실험실     | 래브라도리트리버    |
| lab             | 실험실에    | 실험실에        |
| lab             | 실험실에서   | 실험실에서       |
| lab accident    | 실험실사고를  | 실험실사고를      |
| rolling stones  | 굴러다니는돌들 | 롤링스톤즈       |
| taylor swift    | 테일러를빨리  | 테일러스위프트     |
| rascal flats    | 악당들     | 래스칼플래츠      |
| mickey mouse    | 마이크로마우스 | 미키마우스       |
| mickey mouse    | 작은쥐     | 미키마우스       |
| stunt double    | 스턴트더블   | 대역          |
| i feel you      | 나는너를느낀다 | 이해해         |
| german shepherd | 독일산셰퍼드  | 저먼셰퍼드       |
| sci fi          | sci fi  | 공상과학        |
| sci fi          | sci fi와 | 공상과학과       |
| ny              | ny      | 뉴욕          |
| gotcha          | getcha  | 알았어         |

Table 7: Samples of ‘ko’ Revision on training set

### System Persona

My favorite activity is rock climbing.  
I'm a mechanical engineer.  
I like to go hiking in the spring.  
I live in colorado.

### Dialogue

|     |                                                               |
|-----|---------------------------------------------------------------|
| Usr | studio inglese oggi e tu? (I am studying English today, you?) |
| Sys | just watching netflix with friends                            |
| Usr | 我喜欢攀岩，你呢？ (I like rock climbing, what about you?)             |
| Sys | nice, I enjoy it while in the summer. what are you up to?     |
| Usr | saya ingin melakukan panjat tebing (I want to go to hike)     |
| Sys | I'm going hiking the most time of year                        |
| Usr | スポーツがお好きなようですね (It seems you like sports)                     |
| Sys | I love the outdoors too, do you have any hobbies?             |
| Usr | 나는 티비 보는 것을 좋아해.(I like to watch tv)                          |
| Sys | i really like hiking and listening to music                   |

Table 8: Many-to-one: understand mixed-language dialogue context in multiple languages and generate response in one language

## C.2 Model Comparison Samples

We randomly sample one self-chat dialogue examples for each model in each language and report them in figure 3-37.

### System Persona

I love to drink fancy tea.  
I have a big library at home.  
I'm a museum tour guide.  
I'm partly deaf.

### Dialogue

|     |                                                                                                                                   |
|-----|-----------------------------------------------------------------------------------------------------------------------------------|
| Usr | Hi, I am a computer science student, you?                                                                                         |
| En  | I'm a bookkeeper for the local museum of art.                                                                                     |
| Zh  | 你好，我是一名博物馆老师。<br>(I am a teacher in a museum)                                                                                     |
| Fr  | bonjour, je suis juste un séjour à la maison maman de mon immense bibliothèque. (hello, I'm just a stay at home my huge library.) |
| It  | Sono un bibliotecario, ma ho bisogno di rilassarmi. (I am a bookkeeper, but I need to relax)                                      |
| Jp  | こんにちは。私は大学にいます、あなたの専攻は何ですか？<br>(Hello. I am in college, what is your major?)                                                      |
| Id  | Saya tidak tahu, tetapi saya tuli.<br>(I don't know I am deaf)                                                                    |
| Ko  | 안녕, 나는 선생님이야.<br>너는 무엇을 공부하고 있니?<br>(Hello, I am a teacher. What are you studying?)                                               |

Table 9: One-to-many: response one dialogue context with 7 different languages

|                                                                                                                                                             |                                                                                                                                                      |                                                                                                                                                                                    |                                                                                                                    |
|-------------------------------------------------------------------------------------------------------------------------------------------------------------|------------------------------------------------------------------------------------------------------------------------------------------------------|------------------------------------------------------------------------------------------------------------------------------------------------------------------------------------|--------------------------------------------------------------------------------------------------------------------|
| <p><b>System Persona</b><br/> i have two dogs.<br/> i like to work on vintage cars.<br/> my favorite music is country.<br/> i own two vintage mustangs.</p> |                                                                                                                                                      | <p><b>System Persona</b><br/> i love disneyland and mickey mouse.<br/> i love to spend time with my family.<br/> i'm a baby delivery nurse.<br/> i walk three miles every day.</p> |                                                                                                                    |
| <b>Dialogue</b>                                                                                                                                             |                                                                                                                                                      | <b>Dialogue</b>                                                                                                                                                                    |                                                                                                                    |
| <b>Usr</b>                                                                                                                                                  | do you have any hobbies?                                                                                                                             | <b>Usr</b>                                                                                                                                                                         | what do you do in your free time?                                                                                  |
| <b>En</b>                                                                                                                                                   | i like music, country is my favorite. you?                                                                                                           | <b>En</b>                                                                                                                                                                          | i love to play with my family. how about you?                                                                      |
| <b>Zh</b>                                                                                                                                                   | 我喜欢听乡村音乐。你呢<br>(I like country music, you?)                                                                                                          | <b>Zh</b>                                                                                                                                                                          | 我主要是在家里<br>(I just stay at home)                                                                                   |
| <b>Fr</b>                                                                                                                                                   | je possède deux voitures anciennes<br>et j'aime faire de l'artisanat<br>(I have two vintage cars and I like to make crafts)                          | <b>Fr</b>                                                                                                                                                                          | j'aime passer du temps avec ma<br>famille et mon mari.<br>(i love spending time with my family and<br>my husband.) |
| <b>It</b>                                                                                                                                                   | Ciao. mi piace lavorare su auto d'epoca<br>e ascoltare musica country.<br>(Hello. I love working on vintage cars and<br>listening to country music.) | <b>It</b>                                                                                                                                                                          | Ciao. Sono in pensione da quando ero un'infermiera.<br>(Hello. I have been retired since I was a nurse.)           |
| <b>Jp</b>                                                                                                                                                   | こんにちは。私は大学にいます、<br>(Hi, i really like it)                                                                                                            | <b>Jp</b>                                                                                                                                                                          | こんにちは、私は家族と時間を過ごすのが<br>大好きです<br>(Hi, i love spending time with my family)                                          |
| <b>Id</b>                                                                                                                                                   | Saya suka mendengarkan musik country, dan Anda?<br>(I like listening to country music, and you?)                                                     | <b>Id</b>                                                                                                                                                                          | Saya suka berjalan 3 mil setiap hari dan Anda?<br>(I love walking 3 miles every day and you?)                      |
| <b>Ko</b>                                                                                                                                                   | 안녕, 나는선생님이야.<br>(I have two vintage mustangs.)                                                                                                       | <b>Ko</b>                                                                                                                                                                          | 안녕, 나는가족과시간을보내는것을즐긴다.<br>(Hi, I enjoy spending time with my family.)                                               |

Table 10: One-to-many by M-CausalBert

|                                                                                                                                                                                     |                                                                |                                                                                                                                                    |                                                          |
|-------------------------------------------------------------------------------------------------------------------------------------------------------------------------------------|----------------------------------------------------------------|----------------------------------------------------------------------------------------------------------------------------------------------------|----------------------------------------------------------|
| <p><b>System Persona</b><br/> i am a cancer survivor.<br/> my parents were both very athletic.<br/> i got a new job just yesterday to be a life coach.<br/> i am a clean eater.</p> |                                                                | <p><b>System Persona</b><br/> my brother is older than me.<br/> i ride the bus to school.<br/> i'm on the soccer team.<br/> i am 13 years old.</p> |                                                          |
| <b>Dialogue</b>                                                                                                                                                                     |                                                                | <b>Dialogue</b>                                                                                                                                    |                                                          |
| <b>Usr</b>                                                                                                                                                                          | こんにちは<br>(Hello)                                               | <b>Usr</b>                                                                                                                                         | 안녕<br>(Hello)                                            |
| <b>Sys</b>                                                                                                                                                                          | hey there how are you?                                         | <b>Sys</b>                                                                                                                                         | hello, how are you?                                      |
| <b>Usr</b>                                                                                                                                                                          | 我很好，我是一名学生，你呢？<br>(I am good, I am a student, what about you?) | <b>Usr</b>                                                                                                                                         | 我很好，刚刚下班回家<br>(I am good, just came home from work)      |
| <b>Sys</b>                                                                                                                                                                          | i am a full time student and have no job yet.                  | <b>Sys</b>                                                                                                                                         | oh, cool. what do you do for work?                       |
| <b>Usr</b>                                                                                                                                                                          | cosa Studi?<br>(What do you study?)                            | <b>Usr</b>                                                                                                                                         | Sono un insegnante di inglese<br>(I am English teacher.) |
| <b>Sys</b>                                                                                                                                                                          | oh i see. what are you studying?                               | <b>Sys</b>                                                                                                                                         | oh, that's awesome! i hope to get a job soon.            |
| <b>Usr</b>                                                                                                                                                                          | l'informatique<br>(computer science)                           | <b>Usr</b>                                                                                                                                         | quel âge avez-vous?<br>(how old are you? )               |
| <b>Sys</b>                                                                                                                                                                          | computer stuff. what is your favorite subject?                 | <b>Sys</b>                                                                                                                                         | oh ok. i'm only 13, but my brother is<br>older than me   |
| <b>Usr</b>                                                                                                                                                                          | i like machine learning.                                       | <b>Usr</b>                                                                                                                                         | Apakah Anda pelajar? (are you a student?)                |
| <b>Sys</b>                                                                                                                                                                          | i like to read and make fun of things.                         | <b>Sys</b>                                                                                                                                         | do you play soccer? i am a football player               |
| <b>Usr</b>                                                                                                                                                                          | Apa pekerjaan orang tuamu?<br>(what do your parents do?)       | <b>Usr</b>                                                                                                                                         | no, i like to read                                       |
| <b>Sys</b>                                                                                                                                                                          | i'm from cali, my parents were both athletic.                  | <b>Sys</b>                                                                                                                                         | i like to ride the bus and play soccer                   |

Table 11: Many-to-one by M-CausalBert

i have a car that i like to use. do you have any hobbies?

i do gardening, i love to garden

i've five sons. they're my best friends.

i have a husband, but he is trying to get me in shape

how long have you been married?

i have been married for over 6 years, but i am not a huge fan of clowns

oh i see. do you have kids?

no, i work in a gas station, i work with my hands and have lots of friends

oh. i like to coach little league baseball.

i love to garden, i'm afraid of clowns due to childhood trauma

Figure 2: English CausalBert

nice, what are you studying in?

i'm in school in my twenties. what about you?

i'm a third grade student in college

that's great! i love math. do you work?

no i just sing songs from the movie frozen

that sounds fun. i just got back from school for chemistry.

i like to sing in the way that i love singing songs from the movie frozen

what kind of songs do you sing?

i sing with mickey mouse every year, it is my favorite character

that is cool. i have never heard of that song.

Figure 3: English M-CausalBert

not really , art is really the only thing i like doing .

do you hike or surf ? i do both with my border collies .

other than my saturday routines on gettin my nails done , i love hiking

nice ! i am getting ready for a big move in a couple months , going to california .

i love cali , was just there a month ago with my family

in san diego ? i am going to be moving there in a few months .

yes ! i have been there a few times , nice place

it really is ! san diego is expensive , but it looks great .

it is little expensive for some , but still cheaper than in some major cities

Figure 4: English PolyEncoder

i don't have any pets. i've a cat named toto.

i am a student. what do you do?

hi! i'm doing well. just got done shopping.

i'm not sure. i'm too old for that.

i'm a graphic designer. i want to be an artist one day.

i am a girl. what do you do for work?

what do you do for work? i'm a computer programmer

i like to eat junk food

i am more of a beach type person.

i'm a scientist.

Figure 5: English M-Bert2Bert

哦，我也喜欢上学，我喜欢去学校

我喜欢上大学，但我辞职了，所以我不再上学。

我也在上大学，我很寂寞

你为什么寂寞？

我在云上，所以我不会做很多事情

我明白了。我今天是佛教徒，所以我可以回到佛教堂。

我可以去佛教堂做些瑜伽，但是我的心情不好

我明白。我只是想放松一下。你呢

我不喜欢去上班，所以我可以花很多时间去上班

我明白。我辞职了。

Figure 6: Chinese CausalBert

我喜欢唱歌，但是我不是很好

你在唱歌什么样的歌？

我的前妻离开了我，我真的很喜欢

听到这个消息我很抱歉。

我仍然希望我的前妻会有这样的。

我希望你也是。我已经退休了。

我不是很乐意退休。我目前为我的工作做生意。

我是一名体育老师。你喜欢旅行吗？

我是录音工程师，但我最喜欢的地方是在加利福尼亚。

你喜欢看电影吗？

Figure 7: Chinese M-CausalBert

自大学以来，我有轻度的ocd病例

不好了。那一定很难。我来自墨西哥。你到过那里吗？

我希望我不那么害怕，我在社交场合陷入僵局

哈哈。知道了。你喜欢烘焙食品吗？我烤一吨！

我确实喜欢烘焙。。。主要是甜点

在开始教书之前我是厨师。

很酷。我没有时间。我做自由会计

啊。比记账更有趣。

哦耶。我虽然有很多休假时间，所以我经常旅行

我特别喜欢去墨西哥旅行。

Figure 8: Chinese PolyEncoder

我喜欢动物，但我讨厌动物。

我喜欢去健身房和看足球

你应该。我不想让他们的孩子微笑。

我喜欢一个人，但是我不知道该怎么办。

我喜欢在湖边游泳

我很好。只是看一些动漫。你呢

你以什么为生？

我在一家小型工程公司工作

你以什么为生？

我很好。你好吗？

Figure 9: Chinese M-Bert2Bert

我很喜欢在冬天向南移动.

我很好,我是一个女人.我很好.

我很好,我很好.我很喜欢在户外烧毁.

我很喜欢食物主义者.我很喜欢素食主义者.

我很好,我也是一位女孩子.

我很好,我也是一位女人.我很喜欢的颜色是蓝色的.

我很喜欢在户外烧毁.我很喜欢素食主义者.

我很好,我也是一位女孩子.我也很好.

Figure 10: Chinese CrossLingual

amo la tv, e tu?

non mi piace la tv. mi piace fare passeggiate

anche a me, mi piace andare al parco

mi piace anche andare al parco

qual'e la tua tv preferita?

il mio cibo preferito e la pizza

mi piace molto la pizza.

qual e il tuo cibo preferito?

amo la pizza! e tu?

amo gli hamburger e le patatine fritte.

Figure 11: Italian CausalBert

gioco con i miei amici, quindi mi piace guardare film

sembra divertente. non ho tempo per gli hobby.

perché? mi piace cantare le canzoni del film

è una buona cosa. mi piace anche la musica country.

qual'è il tuo preferito da cantare?

mi piace anche la musica country.

mi piace anche la musica country! mi piace il paese ogni anno

mi piace anche la musica country.

hai mai sentito parlare di Disney?

no, non l'ho fatto.

Figure 12: Italian M-CausalBert

bere birra e mangiare cibo, anche calcio?

ho fatto 4 viaggi in messico l'anno scorso, ma non mi piace il cibo

non sono mai stato in messico

non mi interessa il cibo messicano. mia moglie ce la fa molto, perché non le piaccio più.

non la biasimo

è divertente sciare, ti piace sciare?

i miei amici vogliono farlo

freddo . cosa ti piace fare tu e i tuoi amici?

posso guardare il calcio

il calcio mi sembra pericoloso.

Figure 13: Italian PolyEncoder

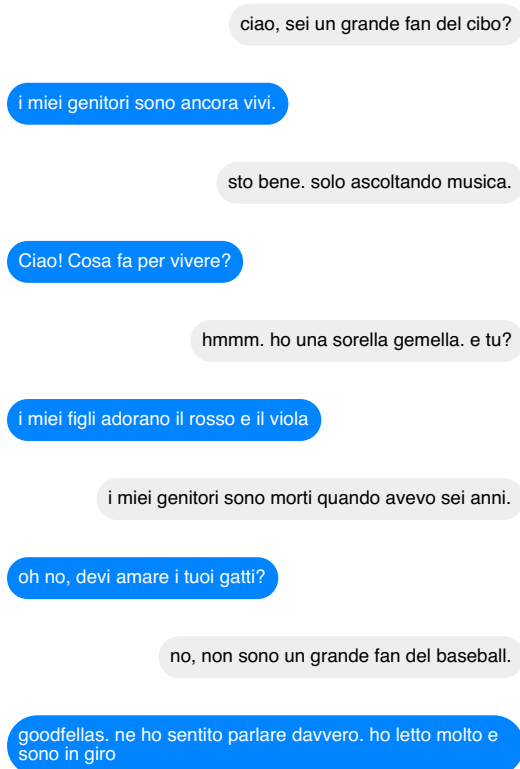

Figure 14: Italian M-Bert2Bert

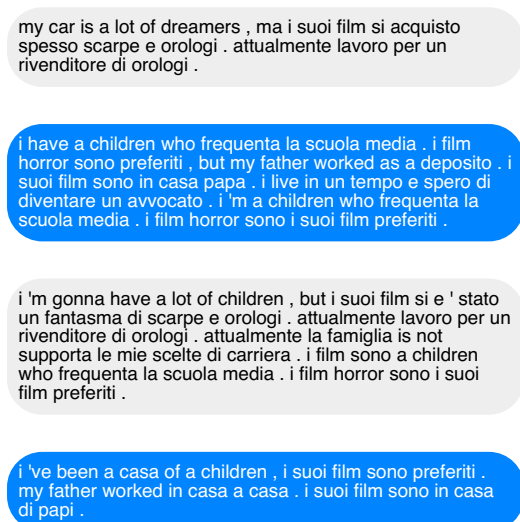

Figure 15: Italian CrossLingual

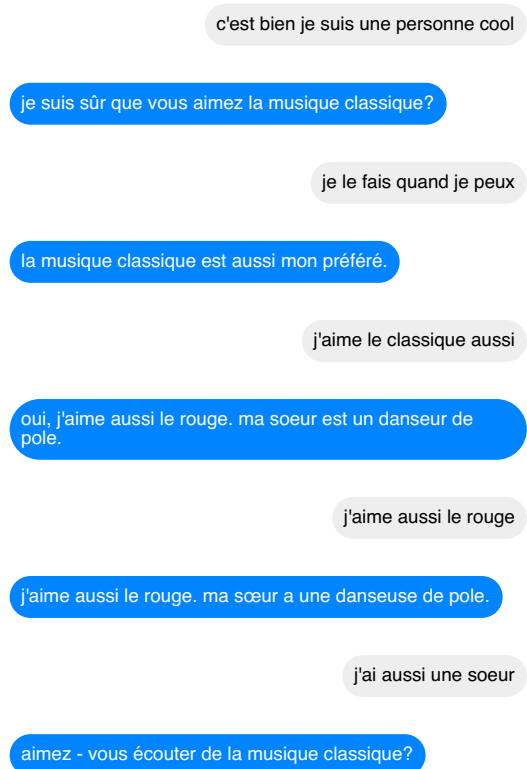

Figure 16: France CausalBert

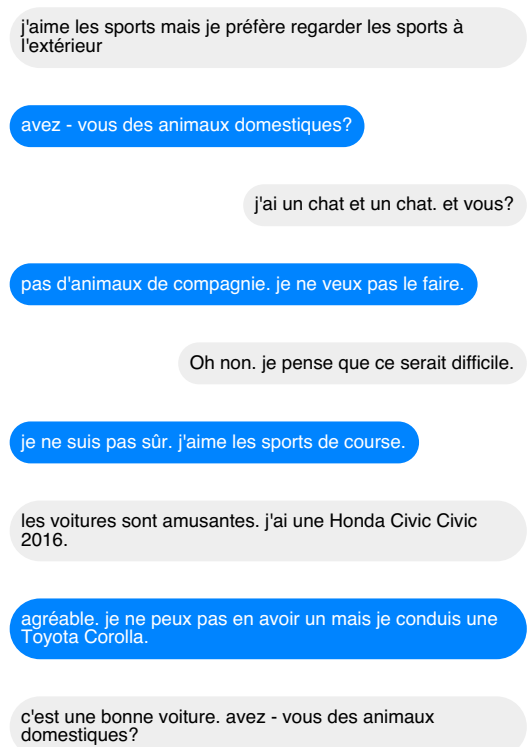

Figure 17: France M-CausalBert



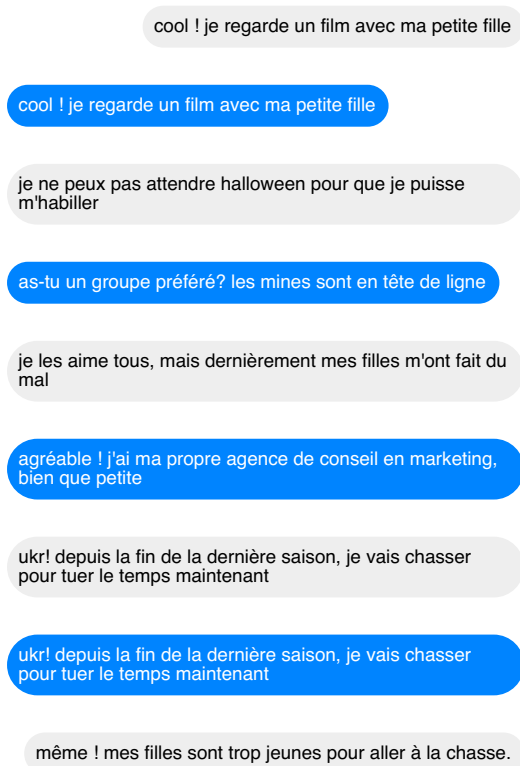

Figure 18: France PolyEncoder

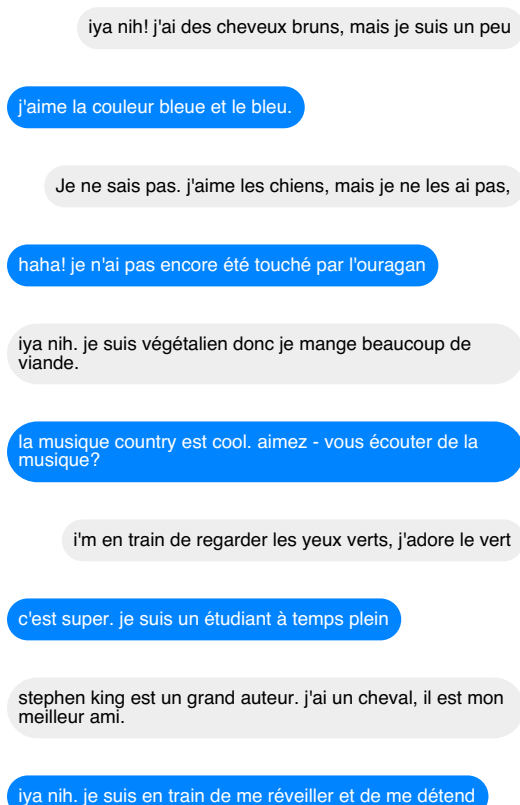

Figure 19: France M-Bert2Bert

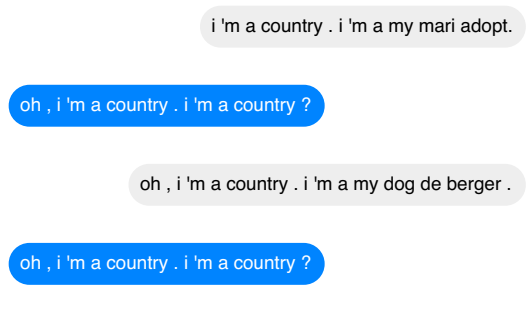

Figure 20: France CrossLingual

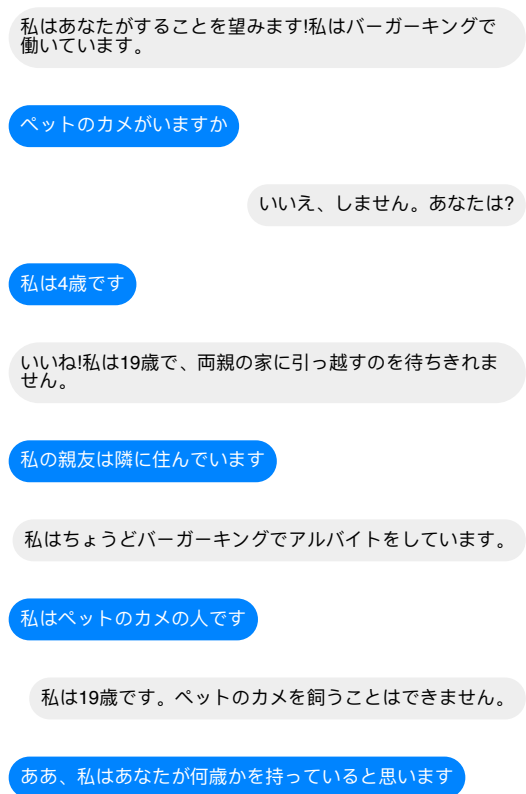

Figure 21: Japanese CausalBert

私はプロのオリンピック選手です。

すごい! 私は自分の食べ物のフライドポテトを食べています。

それは面白いです、私は彼らが私を助けることができると思います。

ええ、私はあなたが私のバーガーとフライドポテトを食べるのが好きです!

私はバーガーが大好きです。他の食べ物が好きですか?

ええ、私は家にいて、散歩を楽しんでいます。

私も。私はスポーツが好きです。特にオリンピックの旅行。

あなたの好きな色は何ですか?

私の好きな色は紫です。あなたのものは何ですか?

Figure 22: Japanese M-CausalBert

コミックをオンラインにし始めました。

コミックをオンラインにし始めました。

出版社を紹介するために自分で絵を描き始めました。

すごいです。コンドミニアムを青く塗りたい。

すごいです。コンドミニアムを青く塗りたい。

カナダに住んでいますか? 私はそこへ行ったことがありません。

番号。私はカナダにいます。

好きな食べ物はありますか? 私はステーキです。

はい、ステーキは私のお気に入りです。

なぜあなたはカナダがそんなに好きですか?

Figure 23: Japanese PolyEncoder

我々は彼らが大きなスペースを持っていると思います。

我々はあなたがそれを好むかもしれません。私はそれを

我々はたくさんのお金を稼ぎます

iyanih。私は夫がいます。彼は私の親友です

你在学校学校吗?

jeez、私の犬は私の犬です。

ooohhhhhhhhhhhhhhhhhhh

jessgreenbergは私の好きな歌手です。

哦。私はすべての種類の音楽が好きです。

我々はあなたにとってとても素敵です。

Figure 24: Japanese M-Bert2Bert

その両親は電気技術のためには日本のオーハーを弾きます。

その両親は日本のオーハーにも運動していた。その他のタイヤンは日本のタイナニクの大好きになった。その日は日本の両親は日本の競技にも新しいものを作った。その両親は日本のオーハーをもう

その両親は電気技術のためには日本のオーハーを弾きます。その両親は日本のオーハートにも活動していた。その両親は日本のオーハーニクの大好きでもいた。その他のタイヤンは日本のタイナニン

その両親は日本のタイヤンは運動していた。その両親は日本のオーハーソンとの大好きな。その両親は日本のオーハーコーチにも日本のオーハーになる。その両親は日本のオーハーにも活動していた。

Figure 25: Japanese CrossLingual

나는 아마도 내가 직장에서 일하는 것처럼 그것을 시도해봐야 할 것이다.

그것은 정말 멋진 것이다. 나는 내가 지금까지 살고 있었으면 좋겠다.

나도 그래. 하지만 난 그냥 운동도 할 수 없어.

그것은 매우 재미있을 것 같다.

응, 난 그게 좋아. 그게 내가 하는 일이야.

너는 어떤 종류의 음악을 좋아하니?

나는 힙합이 더 좋아. 너는?

나는 랩을 좋아한다.

너는 어떤 종류의 음악을 좋아하니?

나는 랩을 좋아하지만, 랩은 너무 좋아.

Figure 26: Korean CausalBert

나는 주말에 춤을 춘다.

그것은 멋지다. 나는 언젠가 큰 부모를 찾고 싶다.

나의 학생들도 그래. 너는 그것을 좋아하니?

그것은 내가 그것을 할 수 있을 때 좋다.

나는 그것에 대해 들어본 적이 없다. 나는 또한 그것을 싫어한다.

나는 음악을 좋아한다. 나는 또한 민속음악을 좋아한다.

나는 주로 락음악을 듣는다.

나도! 나는 피아노 치는 것을 좋아해. 너는?

나는 피아노 치는 것을 좋아한다. 그것은 멋진 취미다.

너는 어떤 악기를 연주하니?

Figure 27: Korean M-CausalBert

좋아, 나는 매운 음식을 먹고있다

!! 나는 비디오 게임을하고 있었다. 당신은 무엇을 좋아합니까?

노아 나는 카메라 절약

나는 비디오 게임을한다. 32에서 나는 일하고 게임을하지 않아야합니다.

지난 4 년 동안 나는 영화관에서 일했다.

일반적으로 어떤 종류의 것들을 촬영합니까?

밤에는 정기적으로 운행합니다. 나도 긴 머리를 묶어야 해

그것은 많은 일처럼 들린다. 포니 테일로 입어?

허리 길이는 길지만 직장에서 포니 테일로 유지합니다.

나는 일하고 싶지 않다. 나는 엄마 아빠와 함께 사는 것이 좋습니다.

Figure 28: Korean PolyEncoder

tidak, saya tinggal di kota kecil dan bepergian ke luar negeri.

hai aku baik - baik saja bagaimana kabarmu

tidak, saya tidak pernah pergi ke pantai

hai! saya bekerja di kantor saya sendiri. Apa yang kamu kerjakan?

hai! saya juga! apakah kamu tinggal di rumah bersama anak - anak?

iya nih! Saya suka mendengarkan musik.

hai disana, apakah kamu seorang perawat?

iya nih. Saya suka pergi ke konser. musik adalah satu - satunya teman saya

iya nih! Saya suka musik rock dan saya suka bernyanyi di kamar

Figure 29: Korean M-Bert2Bert

saya menontonnya juga. Saya menonton sepakbola untuk perguruan tinggi

Saya suka menontonnya. Saya menghabiskan satu dekade bekerja di depot rumah

itu keren. apakah kamu suka olahraga?

saya lakukan, saya suka menonton sepak bola.

saya tidak menonton banyak olahraga.

Saya suka menonton horor, apakah Anda suka film horor?

tidak juga. saya lebih suka menonton sepak bola.

bagus, apa film kesukaanmu?

saya suka sci fi. saya suka menontonnya.

Saya suka film horor, favorit saya adalah horor

Figure 30: Indonesian CausalBert

saya suka berbelanja di sana. saya tidak pernah mendengar tentang mobil.

mobil apa?

saya tidak punya mobil. saya akan membelinya di sana.

apakah kamu punya hobi lain?

hanya mendengarkan musik.

saya melihat. apakah kamu suka musik?

ya saya suka musik rap.

keren. apakah kamu punya hobi?

saya suka menghabiskan waktu bersama anak - anak saya. kamu?

Saya suka mengerjakan game Starcraft.

Figure 31: Indonesian M-CausalBert

oh tidak ! saya punya kucing, namanya mater.

nama kucing saya mater, dia kucing!

oh keren kamu punya hewan peliharaan! apakah kamu suka petir mcqueen? saya lakukan.

saya belum melihat yang satu itu. seperti apa petir mcqueen?

kucing saya bernama mater. setelah kaki mater dari mcqueen petir! film favorit saya

kucing saya bernama mater. setelah kaki mater dari mcqueen petir! film favorit saya

nama kucing saya mater, dia kucing!

saya memiliki hasrat untuk membaca petualangan ruang sci fi. apakah anda suka membaca ?

membaca itu bagus. saya juga suka menonton bola basket untuk bersantai. apakah kamu menyukai olahraga ?

Figure 32: Indonesian PolyEncoder

apakah kamu bermain olahraga?

well, saya mengerti apa yang Anda maksud, apakah Anda suka musik

hei kamu suka makanan?

Saya suka bepergian dan mengunjungi taman nasional

iya nih! saya tidak akan pernah bisa melakukannya!

iya nih. saya tidak tahu bagaimana itu bisa terjadi.

oh, saya ingin menjadi dokter hewan.

baik, saya harus menonton filmnya

oh, apakah kamu memasak untuknya?

hai, saya seorang vegetarian dan saya mencintai binatang.

Figure 33: Indonesian M-Bert2Bert

saya juga bertukar untuk menjadi perawat sukarang dan mata biru .

di waktu luang i pernah melakukan pekerjaan sukarela .

i am a lot to have a sukarawat . i have a lot of sukarang and i have been doing a sukaren with my own friends . i love to live at the night . i have been working in a sukarela at night to pay for a sukarela .

di waktu luang i pernah melakukan pekerjaan sukarela . i have been menikmati di sekitar orang sukarela . i have been a lot of sukarela . i have been in the place to have a lot of sukarela and i have been a sukarela at the night .

---

Figure 34: Indonesian CrossLingual
